# Supplementary material for: Synaptic transistors with human brain-like fJ energy consumption via double oxide semiconductor engineering for neuromorphic electronics
Source: Royal Society of Chemistry journal article supplement (doi:10.1039/d1tc01451j), 2021-01-01
Supplement: d1tc01451j1.pdf [file d1tc01451j1.pdf]

Electronic Supplementary Information (ESI)

**Synaptic Transistors with Human Brain-Like fJ Energy Consumption via Double Oxide Semiconductors Engineering for Neuromorphic Electronics**

Seong-In Cho,<sup>a</sup> Jae Bum Jeon,<sup>a</sup> Joo Hyung Kim,<sup>a</sup> Seung Hee Lee,<sup>a</sup> Wooseok Jeong,<sup>a</sup> Jingyu Kim,<sup>a</sup> Geunyoung Kim,<sup>a</sup> Kyung Min Kim,<sup>\*a</sup> and Sang-Hee Ko Park <sup>\*a</sup>

<sup>a</sup> *Department of Materials Science and Engineering, Korea Advanced Institute of Science and Technology (KAIST), 291 Dae-hak ro, Yuseong-gu 34141, Republic of Korea*

*E-mail:* Kyung Min Kim: [km.kim@kaist.ac.kr](mailto:km.kim@kaist.ac.kr), Sang-Hee Ko Park: [shkp@kaist.ac.kr](mailto:shkp@kaist.ac.kr)

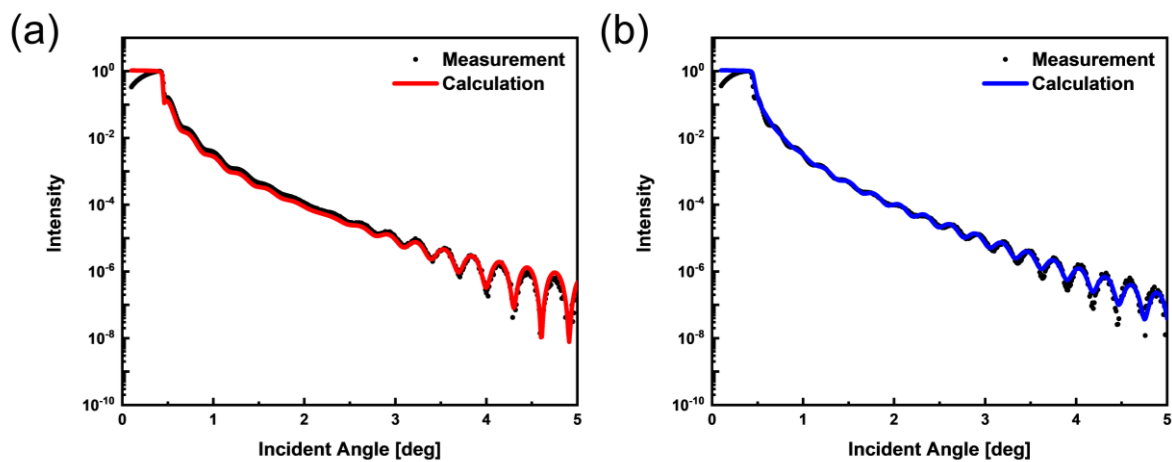

**Fig. S1** XRR results of PEALD SiO<sub>2</sub> deposited at (a) 200 and (b) 300 °C.

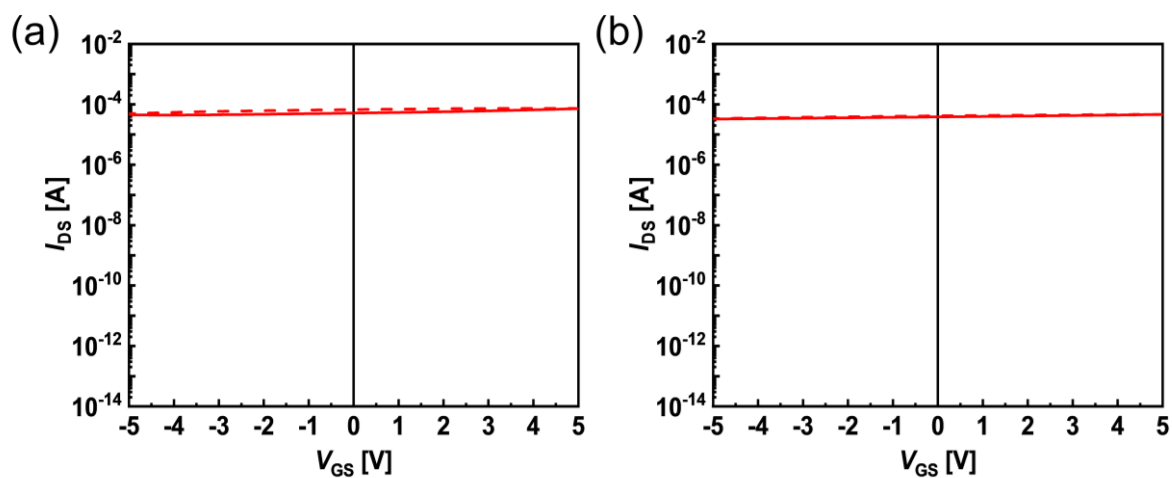

**Fig. S2** Transfer curves of top-gate IZO TFTs with (a) 30 nm and (b) 60 nm of PEALD SiO<sub>2</sub> GI deposited at 200 °C without H barrier. ( $V_{DS} = 0.1$  V) Solid lines represent forward sweeps and dashed lines represent back sweeps.

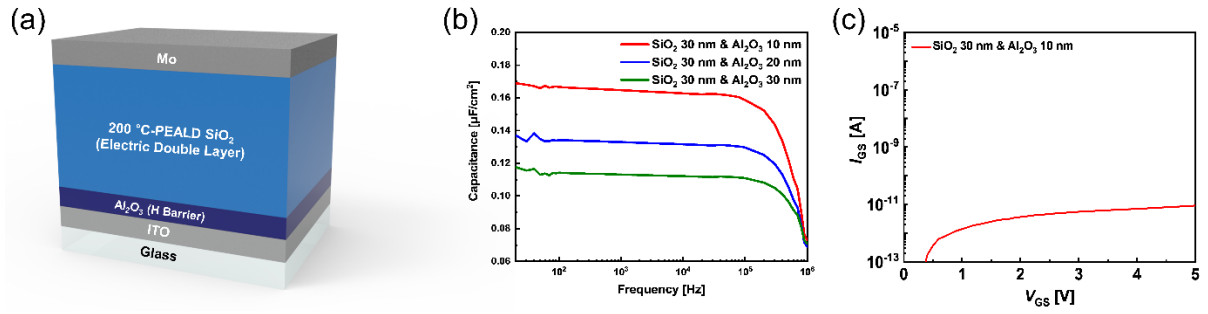

**Fig. S3** (a) Schematic of MIM device with both a SiO<sub>2</sub> EDL and an Al<sub>2</sub>O<sub>3</sub> H barrier. (b) Results of C-F measurements of these MIM devices. (c) Gate leakage current of synaptic transistor with 30-nm SiO<sub>2</sub> EDL and 10-nm Al<sub>2</sub>O<sub>3</sub> GI.

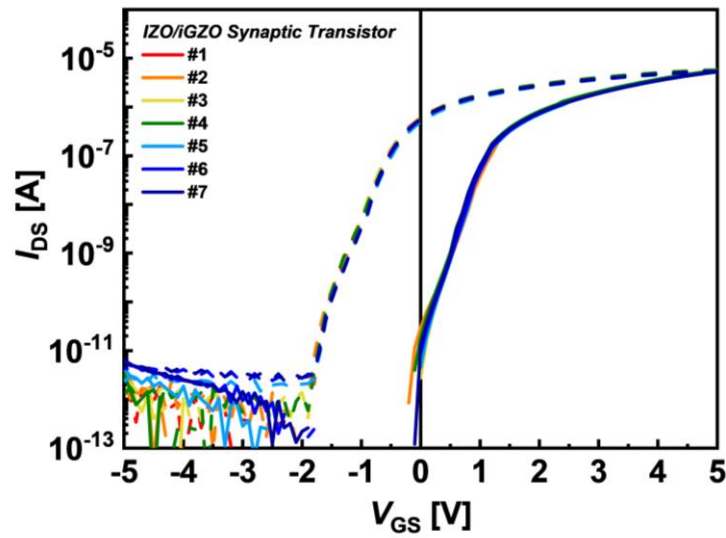

**Fig. S4** Uniformity of transfer curves of IZO/IGZO synaptic transistors ( $V_{DS} = 0.1V$ ). Solid lines represent forward sweeps and dashed lines represent back sweeps.

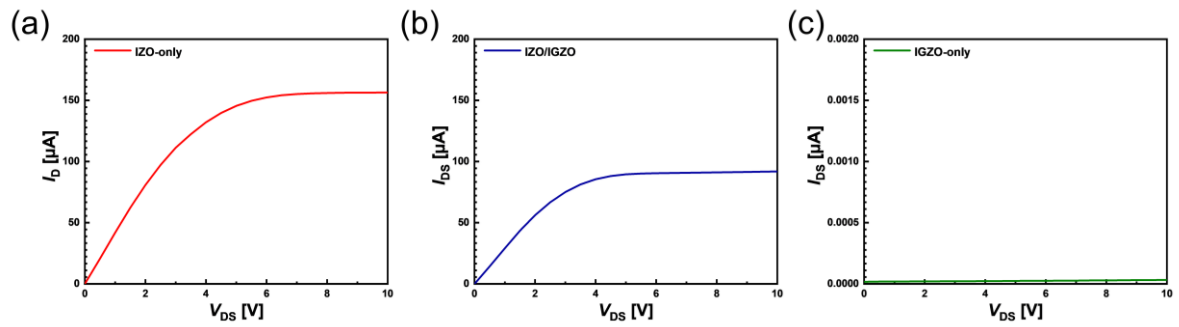

**Fig. S5** Output curves of (a) IZO-only, (b) IZO/IGZO, and (c) IGZO-only synaptic transistor ( $V_{GS} = 3.5$  V).

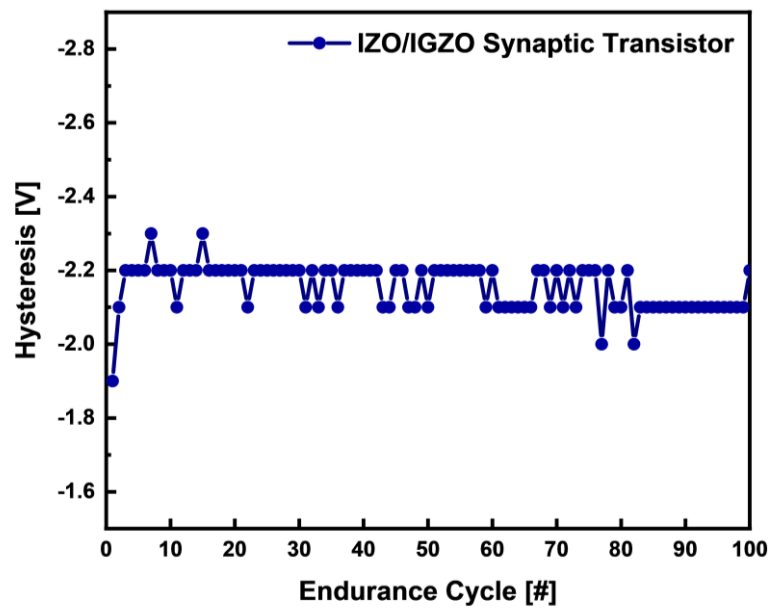

**Fig. S6** Hysteresis window of IZO/IGZO synaptic transistor according to the number of endurance cycles.
